# Supplementary material for: Impact of Edible Cricket Consumption on Gut Microbiota in Healthy Adults, a Double-blind, Randomized Crossover Trial
Source: PubMed Central journal article supplement (PMC6050247; doi:10.1038/s41598-018-29032-2), 2018-07-17
Supplement: 41598_2018_29032_MOESM1_ESM.pdf [file 41598_2018_29032_MOESM1_ESM.pdf]

**What's Hopping: Impact of Edible Cricket Consumption on Gut Microbiota in Healthy Adults, a Double-blind, Randomized Crossover Trial**

Valerie J. Stull,<sup>1\*</sup> Elijah Finer,<sup>2</sup> Rachel S. Bergmans,<sup>3</sup> Hallie P. Febvre,<sup>2</sup> Colin Longhurst,<sup>4</sup> Daniel K. Manter,<sup>5</sup> Jonathan A. Patz,<sup>1</sup> and Tiffany L. Weir<sup>2</sup>

**Supplemental Materials**

**Figure S1 – Digestive Health Questionnaire (see below)**

**Table S1 – All Participant Raw Outcome Data Across Treatments (excluding Cytokines)**

| Study Code (Participant) | Study Arm | Treatment | Period | Na+ mmol/L | K+ mmol/L | tCO2 mmol/L | CL mmol/L | GLU mg/dL | CA mg/dL | BUN mg/DL | CRE mg/dL | ALP U/L | ALT U/L | AST U/L | T-BIL mg/dL | ALB g/dL | TP g/dL | Acetate uM/g | Propiote uM/g | Butyrate uM/g | siIga ug/ml | Fecal Triglycerides mg/100mg |
|--------------------------|-----------|-----------|--------|------------|-----------|-------------|-----------|-----------|----------|-----------|-----------|---------|---------|---------|-------------|----------|---------|--------------|---------------|---------------|-------------|------------------------------|
| HOP-01                   | A         | Control   | 1      | 140        | 4.5       | 23          | 109       | 72        | 9.6      | 12        | 1         | 69      | 30      | 44      | 1.6         | 4        | 6.8     | 8.8294       | 2.5676        | 2.2829        | 2192.6136   | 8.5686                       |
|                          |           | Cricket   | 2      | 145        | 3.6       | 25          | 105       | 81        | 9.6      | 18        | 0.8       | 79      | 21      | 36      | 1.2         | 3.9      | 6.8     | 8.0020       | 2.3057        | 3.5422        | 954.3478    | 3.8627                       |
|                          |           | Baseline  | 0      | 145        | 4.3       | 24          | 109       | 74        | 9.8      | 20        | 1         | 66      | 28      | 47      | 1.5         | 4.1      | 7       | 11.5184      | 2.3763        | 4.2731        | 2560.0094   | 10.5294                      |
| HOP-02                   | A         | Control   | 1      | 140        | 4.2       | 25          | 108       | 81        | 9.8      | 14        | 1.1       | 46      | 19      | 21      | 0.6         | 4.2      | 7.6     | 2.9648       | 1.7586        | 1.1546        | 7894.1213   | 2.4902                       |
|                          |           | Cricket   | 2      | 142        | 4         | 27          | 100       | 93        | 9.7      | 21        | 1.1       | 47      | 16      | 28      | 0.6         | 4.3      | 7.8     | 5.8030       | 2.7750        | 2.1609        | 2760.7955   | 5.0392                       |
|                          |           | Baseline  | 0      | 140        | 4.7       | 26          | 107       | 86        | 9.7      | 17        | 1.1       | 35      | 21      | 21      | 0.9         | 4.4      | 7.6     | 18.0422      | 4.4293        | 4.0677        | 4647.4798   | 3.0784                       |
| HOP-03                   | A         | Control   | 1      | 142        | 4.1       | 26          | 105       | 84        | 9.8      | 12        | 0.7       | 55      | 23      | 35      | 1           | 4.1      | 7.8     | 9.0037       | 3.0246        | 3.1090        | 1849.3371   | 3.0784                       |
|                          |           | Cricket   | 2      | 141        | 3.9       | 26          | 105       | 89        | 9.6      | 15        | 0.9       | 59      | 19      | 33      | 0.8         | 4.2      | 7.7     | 6.7520       | 3.0814        | 2.4436        | 6756.4815   | 7.7843                       |
|                          |           | Baseline  | 0      | 145        | 4.2       | 27          | 105       | 88        | 9.6      | 13        | 1.3       | 68      | 22      | 42      | 1.3         | 4.2      | 8.3     | 22.4331      | 6.5485        | 5.0161        | 1879.3527   | 5.6275                       |
| HOP-04                   | A         | Control   | 1      | 145        | 4.1       | 26          | 105       | 85        | 9.5      | 9         | 0.7       | 73      | 25      | 25      | 0.5         | 3.8      | 7.6     | 11.4940      | 3.1479        | 2.9509        | 2045.0195   | 3.8627                       |
|                          |           | Cricket   | 2      | 140        | 4.1       | 21          | 105       | 81        | 9.4      | 10        | 0.5       | 77      | 19      | 29      | 0.8         | 4        | 7.7     | 8.6862       | 2.8645        | 2.7944        | 2647.1591   | 3.8627                       |
|                          |           | Baseline  | 0      | 142        | 3.7       | 20          | 104       | 89        | 9.4      | 9         | 0.7       | 82      | 21      | 33      | 0.9         | 4        | 8.3     | 8.0649       | 3.2118        | 1.6850        | 1228.1250   | 13.0784                      |
| HOP-05                   | A         | Control   | 1      | 140        | 3.9       | 21          | 108       | 87        | 8.8      | 10        | 0.8       | 35      | 33      | 48      | 0.5         | 3.5      | 7.3     | 15.2514      | 4.7787        | 5.2281        | 1915.6250   | 5.6275                       |
|                          |           | Cricket   | 2      | 139        | 4         | 23          | 103       | 93        | 9.5      | 12        | 0.8       | 42      | 33      | 43      | 0.4         | 3.7      | 7.6     | 14.9655      | 5.0037        | 6.2200        | 7724.5571   | 8.9608                       |
|                          |           | Baseline  | 0      | 136        | 4.6       | 23          | 111       | 90        | 8.5      | 12        | 0.6       | 35      | 28      | 37      | 0.6         | 3.5      | 7.3     | 26.3903      | 7.1148        | 6.9794        | 2890.4891   | 2.6863                       |
| HOP-06                   | A         | Control   | 1      | 131        |           | 16          | 105       | 104       | 9.2      | 9         | 0.6       | 33      | 28      | 54      | 0.8         | 4.1      | 6.6     | 8.2400       | 2.7574        | 2.0813        | 1459.8958   | 5.4314                       |
|                          |           | Cricket   | 2      | 136        | 4.2       | 26          | 100       | 94        | 9        | 13        | 0.7       | 40      | 24      | 32      | 1.2         | 3.7      | 6.6     | 4.6866       | 1.7061        | 1.5946        | 340.1042    | 3.8627                       |
|                          |           | Baseline  | 0      | 136        | 4.7       | 23          | 102       | 104       | 9.2      | 10        | 0.7       | 39      | 42      | 46      | 1.3         | 4        | 7.1     | 17.0702      | 3.8631        | 6.5383        | 0.0000      | 7.1961                       |
| HOP-07                   | A         | Control   | 1      | 145        | 4.5       | 27          | 105       | 94        | 9.7      | 16        | 1.1       | 50      | 23      | 24      | 1           | 4.1      | 7.2     | 6.9813       | 3.4143        | 2.0575        | 571.3362    | 9.1569                       |
|                          |           | Cricket   | 2      | 140        | 4.1       | 27          | 104       | 92        | 9.2      | 15        | 1.1       | 60      | 32      | 34      | 1           | 3.9      | 7       | 8.4481       | 2.4788        | 2.1745        | 3379.6196   | 4.4510                       |
|                          |           | Baseline  | 0      | 145        | 4.4       | 28          | 104       | 85        | 9.5      | 18        | 0.9       | 49      | 22      | 25      | 1.1         | 4.2      | 7.1     | 9.1952       | 2.7309        | 2.1779        | 3516.6045   | 9.7451                       |
| HOP-08                   | A         | Control   | 1      | 139        | 3.7       | 25          | 103       | 90        | 9.5      | 9         | 0.9       | 31      | 18      | 25      | 0.9         | 4        | 7.8     | 20.6920      | 4.1532        | 2.5154        | 27097.9167  | 2.8824                       |
|                          |           | Cricket   | 2      | 143        | 4.6       | 26          | 102       | 86        | 9.8      | 11        | 0.9       | 41      | 21      | 29      | 0.6         | 3.9      | 8.1     | 5.2816       | 2.1563        | 1.5534        | 1760.9069   | 3.2745                       |

|        |   |          |   |     |     |    |     |     |      |    |     |    |    |    |     |     |     |         |        |        |            |         |
|--------|---|----------|---|-----|-----|----|-----|-----|------|----|-----|----|----|----|-----|-----|-----|---------|--------|--------|------------|---------|
|        |   | Baseline | 0 | 137 | 3.5 | 23 | 104 | 94  | 10.1 | 8  | 0.9 | 35 | 21 | 23 | 0.9 | 4.5 | 8.8 | 22.3326 | 8.2921 | 5.2825 | 13106.2500 | 2.8824  |
| HOP-09 | B | Cricket  | 1 | 140 | 3.9 | 26 | 106 | 81  | 9.3  | 18 | 1   | 28 | 26 | 35 | 1.2 | 3.8 | 6.9 | 11.7164 | 2.6886 | 2.6845 | 1750.6944  | 7.9804  |
|        |   | Control  | 2 | 145 | 3.9 | 23 | 105 | 73  | 9.4  | 17 | 0.9 | 30 | 30 | 33 | 0.9 | 4.3 | 7.2 | 8.3503  | 2.7182 | 3.1816 | 2292.6630  | 3.2745  |
|        |   | Baseline | 0 | 139 | 3.9 | 24 | 106 | 80  | 9.5  | 16 | 0.8 | 29 | 22 | 38 | 0.8 | 4.2 | 6.7 | 16.9873 | 3.1844 | 4.9099 | 5783.4746  | 3.0784  |
| HOP-10 | A | Control  | 1 | 140 | 3.9 | 24 | 104 | 102 | 9.3  | 11 | 1   | 49 | 27 | 32 | 1.8 | 4   | 7.5 | 10.5400 | 3.8954 | 2.4870 | 1335.7215  | 4.2549  |
|        |   | Cricket  | 2 | 142 | 3.5 | 26 | 104 | 87  | 9.4  | 13 | 1.3 | 56 | 18 | 35 | 1.8 | 3.9 | 7.3 | 7.8945  | 2.5663 | 1.6821 | 2309.0653  | 6.8039  |
|        |   | Baseline | 0 | 139 | 4   | 25 | 104 | 94  | 9.6  | 10 | 1   | 52 | 20 | 38 | 2.1 | 4   | 8   | 15.2273 | 5.6326 | 3.2044 | 2105.5201  | 7.7843  |
| HOP-11 | B | Cricket  | 1 | 137 | 4.5 | 26 | 100 | 92  | 10.1 | 15 | 1   | 55 | 25 | 29 | 1   | 4.1 | 8.1 | 6.1034  | 3.0261 | 1.5764 |            | 3.2745  |
|        |   | Control  | 2 | 140 | 3.7 | 27 | 103 | 94  | 9.5  | 12 | 0.9 | 49 | 31 | 33 | 1.6 | 4.4 | 8   | 7.3071  | 1.7821 | 2.4169 | 6627.5884  | 4.2549  |
|        |   | Baseline | 0 | 144 | 4   | 25 | 106 | 89  | 9.9  | 13 | 1.1 | 71 | 23 | 36 | 0.8 | 4.2 | 8.3 | 18.0803 | 3.5470 | 5.4745 | 1661.8702  | 5.6275  |
| HOP-12 | B | Cricket  | 1 | 140 | 4   | 21 | 104 | 96  | 9.7  | 13 | 0.8 | 61 | 23 | 25 | 0.8 | 3.5 | 7.2 | 4.3757  | 1.8410 | 1.0674 | 157.8125   | 43.4706 |
|        |   | Control  | 2 | 137 | 3.7 | 21 | 107 | 87  | 9.4  | 9  | 1   | 63 | 21 | 27 | 0.5 | 3.6 | 7.7 | 5.5226  | 2.2172 | 1.7276 | 123.5950   | 3.8627  |
|        |   | Baseline | 0 |     |     |    |     |     |      |    |     |    |    |    |     |     |     | 8.0203  | 2.5392 | 1.3567 | 996.1538   | 13.0784 |
| HOP-13 | B | Cricket  | 1 | 143 | 4   | 26 | 106 | 88  | 8.6  | 13 | 0.8 | 35 | 18 | 25 | 1.6 | 3.2 | 5.9 | 9.5755  | 2.6986 | 2.5026 | 1837.5000  | 2.6863  |
|        |   | Control  | 2 | 139 | 4.2 | 21 | 114 | 84  | 9    | 14 | 1   | 33 | 21 | 22 | 0.8 | 3.3 | 5.8 | 6.4452  | 1.7635 | 1.8021 | 1960.8553  | 12.6863 |
|        |   | Baseline | 0 | 142 | 3.6 | 26 | 106 | 88  | 8.4  | 12 | 0.8 | 40 | 18 | 33 | 1.5 | 3.1 | 5.6 | 19.9844 | 3.7507 | 5.4708 | 2802.5735  | 2.6863  |
| HOP-14 | A | Control  | 1 | 141 | 4   | 23 | 104 | 88  | 8.8  | 15 | 1   | 57 | 26 | 30 | 1.2 | 4.1 | 7.4 | 8.2330  | 2.6385 | 2.0977 | 819.5076   | 3.8627  |
|        |   | Cricket  | 2 | 139 | 3.7 | 25 | 106 | 94  | 9.1  | 13 | 0.7 | 65 | 23 | 23 | 1.1 | 3.7 | 7.4 | 5.8371  | 1.9932 | 1.6712 | 3968.1818  | 6.8039  |
|        |   | Baseline | 0 | 138 | 3.5 | 24 | 105 | 92  | 9.3  | 10 | 0.9 | 64 | 24 | 31 | 1.6 | 4.4 | 7.7 | 7.5893  | 2.7537 | 2.6036 | 5590.2902  | 5.6275  |
| HOP-15 | B | Cricket  | 1 | 140 | 3.9 | 20 | 104 | 91  | 9.6  | 14 | 0.7 | 38 | 22 | 31 | 0.8 | 3.9 | 8   | 5.6003  | 2.3004 | 1.6008 | 1876.5625  | 5.2353  |
|        |   | Control  | 2 | 138 | 4   | 24 | 105 | 77  | 9.4  | 13 | 0.9 | 33 | 19 | 30 | 0.7 | 3.8 | 7.7 | 4.6511  | 1.9195 | 1.1982 | 4146.7831  | 4.2549  |
|        |   | Baseline | 0 | 136 | 3.8 | 18 | 101 | 81  | 9.5  | 14 | 0.8 | 38 | 24 | 34 | 0.7 | 4   | 8   | 16.9486 | 4.4727 | 6.0211 | 1314.6161  | 7.1961  |
| HOP-16 | B | Cricket  | 1 | 141 |     |    |     | 94  | 9    | 11 | 0.9 | 70 | 24 | 28 | 0.8 | 4   | 7   | 12.8169 | 5.1879 | 4.6037 | 1148.9407  | 26.0196 |
|        |   | Control  | 2 |     | 4.4 | 25 | 105 | 90  | 9.4  | 12 | 1.1 | 55 | 39 | 41 | 1.1 | 4.1 | 7   | 5.5918  | 2.4580 | 2.5620 | 0.0000     | 6.0196  |
|        |   | Baseline | 0 | 143 | 4.1 | 24 | 107 | 89  | 9.5  | 10 | 0.8 | 64 | 28 | 33 | 0.8 | 3.8 | 7.3 | 13.9166 | 5.4759 | 6.0758 | 1042.6630  | 9.7451  |
| HOP-17 | B | Cricket  | 1 | 139 | 3.8 | 21 | 104 | 91  | 9.7  | 12 | 0.5 | 48 | 18 | 25 | 1   | 3.9 | 7.4 | 6.5102  | 2.3117 | 1.7918 | 2921.5601  | 8.1765  |
|        |   | Control  | 2 | 139 | 3.7 | 24 | 102 | 81  | 9.4  | 11 | 0.7 | 51 | 16 | 26 | 0.8 | 3.9 | 7.1 | 6.4850  | 2.2120 | 0.9719 | 5291.4474  | 3.8627  |
|        |   | Baseline | 0 | 142 | 4.3 | 24 | 105 | 98  | 9.6  | 11 | 0.8 | 48 | 19 | 29 | 0.8 | 4.2 | 8.1 | 6.0911  | 2.3635 | 1.6756 | 12037.5584 | 2.8824  |

|        |   |          |   |     |     |    |     |    |     |    |     |    |    |    |     |     |     |         |        |         |           |        |
|--------|---|----------|---|-----|-----|----|-----|----|-----|----|-----|----|----|----|-----|-----|-----|---------|--------|---------|-----------|--------|
| HOP-18 | B | Cricket  | 1 | 143 |     |    |     | 96 | 9.5 | 14 | 1   | 46 | 15 | 25 | 0.6 | 4   | 7.4 | 9.3659  | 2.6975 | 2.6375  | 384.6491  | 4.2549 |
|        |   | Control  | 2 |     | 4.9 | 25 | 108 | 92 | 9.7 | 15 | 1.2 | 44 | 20 | 33 | 0.6 | 3.8 | 7.4 | 6.0807  | 2.5948 | 2.7407  | 3148.8839 | 2.6863 |
|        |   | Baseline | 0 | 143 | 4.9 | 26 | 103 | 87 | 9.7 | 14 | 0.9 | 42 | 25 | 26 | 0.7 | 3.8 | 7.4 | 12.0446 | 4.2132 | 3.6354  | 4106.8452 | 7.7843 |
| HOP-19 | B | Cricket  | 1 | 138 | 4   | 27 | 105 | 94 | 9.4 | 15 | 1   | 89 | 51 | 53 | 0.8 | 3.9 | 7   | 13.2316 | 5.1151 | 5.6520  | 1525.0000 | 3.8627 |
|        |   | Control  | 2 | 139 | 4   | 27 | 106 | 94 | 9.4 | 13 | 1.1 | 89 | 48 | 37 | 0.6 | 3.7 | 6.6 | 11.9889 | 4.3729 | 4.3849  | 1081.2500 |        |
|        |   | Baseline | 0 | 142 | 4   | 24 | 106 | 99 | 9.6 | 16 | 1.3 | 86 | 37 | 45 | 0.7 | 3.8 | 6.9 | 30.2302 | 9.4166 | 11.1285 | 0.0000    | 5.6275 |
| HOP-20 | B | Cricket  | 1 | 139 | 4   | 30 | 101 | 98 | 9.5 | 14 | 1.3 | 88 | 35 | 32 | 1.3 | 4.3 | 7.4 | 8.2269  | 2.7751 | 2.4969  | 1853.4439 | 2.8824 |
|        |   | Control  | 2 | 141 | 3.9 | 28 | 105 | 93 | 9.1 | 12 | 1.3 | 88 | 24 | 31 | 1.5 | 4.3 | 7.1 | 4.8628  | 2.1711 | 1.6682  | 1731.2500 |        |
|        |   | Baseline | 0 | 142 | 4.2 | 26 | 106 | 90 | 9.4 | 15 | 1.1 | 84 | 35 | 42 | 0.6 | 4   | 7.1 | 9.9266  | 3.2821 | 2.6120  | 1678.8086 | 4.6471 |

**Table S2 - Linear Mixed Effects Model of GI Indicators**

| Test             | Coefficient | $\hat{\beta}$ | SE ( $\hat{\beta}$ ) | 95% CI           | p-value  |
|------------------|-------------|---------------|----------------------|------------------|----------|
| Colon            | (Intercept) | 0.3683        | 0.4477               | (-0.505, 1.246)  | 0.416    |
|                  | Baseline    | 0.2726        | 0.1913               | (-0.096, 0.638)  | 0.171    |
|                  | Treatment   | 0.5000        | 0.4384               | (-0.369, 1.359)  | 0.269    |
|                  | Period      | -0.3000       | 0.4384               | (-1.145, 0.553)  | 0.503    |
| Intestine        | (Intercept) | 1.0729        | 0.8532               | (-0.603, 2.687)  | 0.217    |
|                  | Baseline    | 0.6004        | 0.1055               | (0.388, 0.807)   | 2.13e-05 |
|                  | Treatment   | 0.4500        | 0.7167               | (-0.940, 1.848)  | 0.538    |
|                  | Period      | -1.0500       | 0.7167               | (-2.460, 0.334)  | 0.160    |
| Inflammation     | (Intercept) | 0.3388        | 0.6283               | (-0.884, 1.555)  | 0.59327  |
|                  | Baseline    | 0.4255        | 0.1378               | (0.149, 0.695)   | 0.00633  |
|                  | Treatment   | 0.1500        | 0.5336               | (-0.845, 1.192)  | 0.78183  |
|                  | Period      | 0.5500        | 0.5336               | (-0.496, 1.634)  | 0.31631  |
| Gastric Function | (Intercept) | 0.6408        | 0.5944               | (-0.549, 1.807)  | 0.2905   |
|                  | Baseline    | 0.4780        | 0.2276               | (0.045, 0.942)   | 0.0501   |
|                  | Treatment   | 0.4500        | 0.3905               | (-0.339, 1.249)  | 0.2643   |
|                  | Period      | -0.5500       | 0.3905               | (-1.3023, 0.225) | 0.1760   |

**Table S3 - Mixed Linear Effects Model Results of Comprehensive Metabolic Panels**

| Test                         | Coefficient | $\hat{\beta}$ | SE ( $\hat{\beta}$ ) | 95% CI                                                             | p-value  |
|------------------------------|-------------|---------------|----------------------|--------------------------------------------------------------------|----------|
| Sodium<br>(mmol/L)           | (Intercept) | 93.9825       | 21.4695              | (52.081, 134.732)                                                  | 0.000425 |
|                              | Baseline    | 0.3270        | 0.1525               | (0.0367, 0.627)                                                    | 0.046418 |
|                              | Treatment   | -0.0190       | 0.8226               | (-1.685, 1.579)                                                    | 0.981891 |
|                              | Period      | 0.4150        | 0.8226               | (-1.188, 2.043)                                                    | 0.617048 |
| Potassium<br>(mmol/L)        | (Intercept) | 3.3452        | 0.5443               | (2.250, 4.389)                                                     | 8.11e-07 |
|                              | Baseline    | 0.1876        | 0.1326               | (-0.067, 0.456)                                                    | 0.167    |
|                              | Treatment   | -0.0486       | 0.1027               | (-0.249, 0.156)                                                    | 0.640    |
|                              | Period      | -0.0941       | 0.1018               | (-0.289, 0.107)                                                    | 0.363    |
| tCO <sub>2</sub><br>(mmol/L) | (Intercept) | 10.9394       | 4.2552               | (2.647, 19.269)                                                    | 0.01974  |
|                              | Baseline    | 0.5352        | 0.1739               | (0.196, 0.871)                                                     | 0.00694  |
|                              | Treatment   | 0.6599        | 0.8064               | (-0.915, 2.256)                                                    | 0.42405  |
|                              | Period      | 0.9401        | 0.8064               | (-0.628, 2.536)                                                    | 0.25923  |
| CL-<br>(mmol/L)              | (Intercept) | 81.1406       | 20.7760              | (40.845, 121.354)                                                  | 0.00118  |
|                              | Baseline    | 0.2336        | 0.1971               | (-0.148, 0.613)                                                    | 0.25284  |
|                              | Treatment   | -0.0006       | 0.7649               | (-1.569, 1.518)                                                    | 0.99935  |
|                              | Period      | -2.1994       | 0.7648               | (-3.716, -0.746)                                                   | 0.01064  |
| GLU<br>(mg/dL)               | (Intercept) | 34.1094       | 13.5428              | (8.205, 61.571)                                                    | 0.021930 |
|                              | Baseline    | 0.6123        | 0.1507               | (0.309, 0.908)                                                     | 0.000807 |
|                              | Treatment   | -2.4611       | 1.6469               | (-5.670, 0.710)                                                    | 0.153407 |
|                              | Period      | 2.7611        | 1.6469               | (-0.474, 6.093)                                                    | 0.111924 |
| CA<br>(mg/dL)                | (Intercept) | 4.3944        | 0.9179               | (2.574e+00,                                                        | 3.23e-05 |
|                              | Baseline    | 0.5277        | 0.0967               | 6.171e+00)                                                         | 4.41e-06 |
|                              | Treatment   | -0.0072       | 0.0778               | (3.391e-01, 7.186e-                                                | 0.927    |
|                              | Period      | 0.0372        | 0.0778               | 01)<br>(-1.539e-01,<br>1.427e-01)<br>(-1.134388e-01,<br>1.912e-01) | 0.635    |

|                 |             |         |        |                  |          |
|-----------------|-------------|---------|--------|------------------|----------|
| BUN<br>(mg/dL)  | (Intercept) | 4.9611  | 1.3588 | (2.227, 7.539)   | 0.00164  |
|                 | Baseline    | 0.5421  | 0.0975 | (0.355, 0.739)   | 3.45e-05 |
|                 | Treatment   | 0.8111  | 0.5226 | (-0.229, 1.822)  | 0.13903  |
|                 | Period      | 1.5889  | 0.5226 | (0.546, 2.609)   | 0.00739  |
| CRE<br>(mg/dL)  | (Intercept) | 0.4713  | 0.1950 | (0.095, 0.845)   | 0.0268   |
|                 | Baseline    | 0.4937  | 0.2057 | (0.090, 0.892)   | 0.0281   |
|                 | Treatment   | 0.0450  | 0.0373 | (-0.030, 0.118)  | 0.2446   |
|                 | Period      | -0.0550 | 0.0373 | (-0.1281, 0.018) | 0.1590   |
| ALP<br>(U/L)    | (Intercept) | 1.5483  | 5.0477 | (-8.225, 11.315) | 0.762636 |
|                 | Baseline    | 0.8982  | 0.0878 | (0.728, 1.067)   | 1.11e-08 |
|                 | Treatment   | 2.0111  | 0.9954 | (0.063, 4.085)   | 0.059387 |
|                 | Period      | 4.7889  | 0.9954 | (2.7612, 6.768)  | 0.000163 |
| ALT<br>(U/L)    | (Intercept) | 7.7869  | 5.8564 | (-4.060, 19.268) | 0.20019  |
|                 | Baseline    | 0.7432  | 0.2216 | (0.313, 1.177)   | 0.00376  |
|                 | Treatment   | -0.5222 | 1.4769 | (-3.562, 2.336)  | 0.72800  |
|                 | Period      | -2.0778 | 1.4769 | (-4.908, 0.734)  | 0.17750  |
| AST<br>(U/L)    | (Intercept) | 10.3710 | 5.1934 | (0.120, 20.795)  | 0.059904 |
|                 | Baseline    | 0.6565  | 0.1410 | (0.370, 0.936)   | 0.000227 |
|                 | Treatment   | -0.6333 | 2.0170 | (-4.578, 3.306)  | 0.757342 |
|                 | Period      | -0.9667 | 2.0170 | (-4.932, 3.012)  | 0.637859 |
| TBIL<br>(mg/dL) | (Intercept) | 0.4298  | 0.1752 | (0.096, 0.777)   | 0.02333  |
|                 | Baseline    | 0.5492  | 0.1513 | (0.246, 0.847)   | 0.00207  |
|                 | Treatment   | -0.0478 | 0.0753 | (-0.197, 0.100)  | 0.53419  |
|                 | Period      | 0.0078  | 0.0753 | (-0.140, 0.154)  | 0.91894  |
| ALB<br>(g/dL)   | (Intercept) | 1.8175  | 0.4755 | (0.918, 2.762)   | 0.001339 |
|                 | Baseline    | 0.5371  | 0.1175 | (0.305, 0.761)   | 0.000272 |
|                 | Treatment   | -0.0072 | 0.0518 | (-0.108, 0.095)  | 0.890686 |
|                 | Period      | -0.0628 | 0.0518 | (-0.164, 0.042)  | 0.241838 |
| TP<br>(g/dL)    | (Intercept) | 2.4711  | 0.5971 | (1.258, 3.613)   | 0.000679 |
|                 | Baseline    | 0.6379  | 0.0791 | (0.488, 0.801)   | 3.25e-07 |
|                 | Treatment   | -0.0467 | 0.0461 | (-0.136, 0.047)  | 0.325404 |
|                 | Period      | 0.0867  | 0.0461 | (-0.007, 0.181)  | 0.077255 |

**Table S4 - Mixed Linear Effects Model Results of SCFAs, sIgA, and Fecal Triglycerides**

| Test                                 | Coefficient | $\hat{\beta}$ | SE ( $\hat{\beta}$ ) | 95% CI           | p-value  |
|--------------------------------------|-------------|---------------|----------------------|------------------|----------|
| Acetate<br>(uM/g)                    | (Intercept) | 5.9377        | 1.4992               | (3.070, 8.891)   | 0.000542 |
|                                      | Baseline    | 0.2381        | 0.0812               | (0.077, 0.398)   | 0.008905 |
|                                      | Treatment   | -2.3055       | 0.8812               | (-3.981, -0.574) | 0.017486 |
|                                      | Period      | -0.2818       | 0.8812               | (-2.082, 1.425)  | 0.752799 |
| Propionate<br>(uM/g)                 | (Intercept) | 1.7334        | 0.3266               | (1.076, 2.388)   | 1.60e-05 |
|                                      | Baseline    | 0.3083        | 0.0607               | (0.188, 0.428)   | 7.89e-05 |
|                                      | Treatment   | -0.5819       | 0.1946               | (-0.968, 0.195)  | 0.00786  |
|                                      | Period      | 0.0614        | 0.1946               | (-0.324, 0.447)  | 0.75612  |
| Butyrate<br>(uM/g)                   | (Intercept) | 1.1510        | 0.4763               | (0.228, 2.101)   | 0.02474  |
|                                      | Baseline    | 0.3065        | 0.0903               | (0.127, 0.483)   | 0.00324  |
|                                      | Treatment   | -0.2044       | 0.1949               | (-0.589, 0.179)  | 0.30819  |
|                                      | Period      | 0.1916        | 0.1949               | (-0.194, 0.564)  | 0.33858  |
| sIgA<br>(ug/ml)                      | (Intercept) | 3.2385        | 1.9852               | (-0.713, 6.978)  | 0.53323  |
|                                      | Baseline    | 0.5347        | 0.2463               | (0.069, 1.027)   | 0.00174  |
|                                      | Treatment   | 0.4268        | 0.3058               | (-0.173, 1.015)  | 0.90760  |
|                                      | Period      | -0.1785       | 0.3058               | (-0.776, 0.425)  | 0.30933  |
| Fecal<br>Triglycerides<br>(mg/100mg) | (Intercept) | 0.2288        | 0.3655               | (-0.466, 0.926)  | 0.53545  |
|                                      | Baseline    | 0.7098        | 0.1975               | (0.3223, 1.091)  | 0.00102  |
|                                      | Treatment   | 0.1650        | 0.1679               | (-0.158, 0.498)  | 0.33281  |
|                                      | Period      | 0.2474        | 0.1679               | (-0.088, 0.580)  | 0.14986  |

**Table S5 - Mixed Linear Effects Model Results of Cytokines**

| Test             | Coefficient | $\hat{\beta}$ | SE ( $\hat{\beta}$ ) | 95% CI            | p-value  |
|------------------|-------------|---------------|----------------------|-------------------|----------|
| GMCSF<br>(pg/ml) | (Intercept) | 8.24584       | 15.05226             | (-21.246, 36.732) | 0.596    |
|                  | Baseline    | 0.92624       | 0.08601              | (0.763, 1.098)    | 4.87e-06 |
|                  | Treatment   | 11.52542      | 6.81733              | (-1.707, 24.977)  | 0.129    |
|                  | Period      | -2.74792      | 6.81733              | (-16.401, 10.339) | 0.697    |

|                                 |             |          |         |                  |          |
|---------------------------------|-------------|----------|---------|------------------|----------|
| IFn-<br>gamma<br>(pg/ml)        | (Intercept) | 2.9737   | 2.6839  | (-2.243, 8.319)  | 0.289676 |
|                                 | Baseline    | 0.7964   | 0.1471  | (0.499, 1.089)   | 0.000635 |
|                                 | Treatment   | 0.6629   | 1.5837  | (-2.487, 3.854)  | 0.686537 |
|                                 | Period      | -2.7654  | 1.5837  | (-5.964, 0.218)  | 0.118931 |
| IL-10<br>(pg/ml)                | (Intercept) | 7.7485   | 3.9303  | (0.129, 15.469)  | 0.0662   |
|                                 | Baseline    | 0.6842   | 0.0849  | (0.524, 0.847)   | 5.06e-07 |
|                                 | Treatment   | 1.6479   | 3.5283  | (-5.510, 8.749)  | 0.6468   |
|                                 | Period      | -4.4304  | 3.5283  | (-11.415, 2.498) | 0.2273   |
| IL-12/p70<br>(pg/ml)            | (Intercept) | 1.8288   | 0.8353  | (0.163, 3.480)   | 0.05463  |
|                                 | Baseline    | 0.6266   | 0.1277  | (0.374, 0.885)   | 0.00118  |
|                                 | Treatment   | 0.3775   | 0.3213  | (-0.256, 1.024)  | 0.27387  |
|                                 | Period      | 0.4425   | 0.3213  | (-1.084, 0.177)  | 0.20580  |
| IL-13<br>(pg/ml)                | (Intercept) | 2.56808  | 2.8248  | (-2.947, 8.282)  | 0.378    |
|                                 | Baseline    | 0.86415  | 0.0387  | (0.786, 0.942)   | 1.7e-08  |
|                                 | Treatment   | -1.01333 | 2.1286  | (-5.160, 3.146)  | 0.647    |
|                                 | Period      | 1.33833  | 2.1286  | (-2.773, 5.444)  | 0.547    |
| IL-13<br>(log-scale)<br>(pg/ml) | (Intercept) | -0.0565  | 0.1806  | (-0.407, 0.297)  | 0.762    |
|                                 | Baseline    | 1.0030   | 0.0605  | (0.887, 1.124)   | 1.78e-07 |
|                                 | Treatment   | 0.0716   | 0.0527  | (-0.033, 0.173)  | 0.212    |
|                                 | Period      | -0.0164  | 0.0527  | (-0.121, 0.085)  | 0.764    |
| IL-1b<br>(pg/ml)                | (Intercept) | 0.0578   | 0.4843  | (0.932, 1.063)   | 0.907815 |
|                                 | Baseline    | 0.9447   | 0.1596  | (0.616, 1.278)   | 0.000354 |
|                                 | Treatment   | 0.0346   | 0.1060  | (-0.169, 0.244)  | 0.752550 |
|                                 | Period      | -0.1371  | 0.10560 | (-0.344, 0.079)  | 0.231930 |



|                 |             |          |         |                  |          |
|-----------------|-------------|----------|---------|------------------|----------|
| IL-2<br>(pg/ml) | (Intercept) | 0.5934   | 0.5400  | (-0.446, 1.670)  | 0.30176  |
|                 | Baseline    | 0.7999   | 0.1600  | (0.483, 1.109)   | 0.00105  |
|                 | Treatment   | -0.0433  | 0.1287  | (-0.300, 0.199)  | 0.74495  |
|                 | Period      | -0.1667  | 0.1287  | (-0.419, 0.080)  | 0.23135  |
| IL-4<br>(pg/ml) | (Intercept) | 26.3030  | 11.6297 | (3.110, 49.315)  | 0.046336 |
|                 | Baseline    | 0.6466   | 0.0945  | (0.464, 0.832)   | 0.000132 |
|                 | Treatment   | 6.2325 - | 5.4463  | (-4.608, 16.943) | 0.285560 |
|                 | Period      | 1.8825   | 5.4463  | (-12.390, 8.748) | 0.738522 |
| IL-5<br>(pg/ml) | (Intercept) | 0.1241   | 0.2817  | (-0.419, 0.668)  | 0.666    |
|                 | Baseline    | 0.9176   | 0.0143  | (0.890, 0.945)   | 3.93e-12 |
|                 | Treatment   | 0.0454   | 0.2865  | (-0.514, 0.613)  | 0.878    |
|                 | Period      | -0.1679  | 0.2865  | (-0.731, 0.390)  | 0.574    |
| IL-6<br>(pg/ml) | (Intercept) | 0.6907   | 0.6616  | (-0.621, 1.950)  | 0.317    |
|                 | Baseline    | 0.8688   | 0.1042  | (0.654, 1.077)   | 3.23e-05 |
|                 | Treatment   | 0.3492 - | 0.3995  | (-0.435, 1.142)  | 0.408    |
|                 | Period      | 0.4692   | 0.3995  | (-1.238, 0.301)  | 0.274    |
| IL-7<br>(pg/ml) | (Intercept) | 7.4177   | 4.6276  | (-1.578, 16.393) | 0.1463   |
|                 | Baseline    | 0.7015   | 0.2443  | (0.231, 1.169)   | 0.0208   |
|                 | Treatment   | -1.0375  | 0.8050  | (-2.630, 0.506)  | 0.2335   |
|                 | Period      | -0.3825  | 0.8050  | (-2.010, 1.180)  | 0.6474   |
| IL-8<br>(pg/ml) | (Intercept) | 0.5473   | 0.6856  | (-0.817, 1.874)  | 0.444    |
|                 | Baseline    | 0.9179   | 0.0963  | (0.734, 1.108)   | 1.21e-05 |
|                 | Treatment   | 0.0204   | 0.2575  | (-0.468, 0.520)  | 0.939    |
|                 | Period      | 0.0571   | 0.2575  | (-0.438, 0.564)  | 0.830    |
| TNFa<br>(pg/ml) | (Intercept) | 2.8670   | 2.5269  | (-2.195, 7.811)  | 0.28915  |
|                 | Baseline    | 0.7210   | 0.3131  | (0.107, 1.337)   | 0.05027  |
|                 | Treatment   | -0.5250  | 0.2033  | (-0.925, -0.118) | 0.03247  |
|                 | Period      | -0.7750  | 0.2033  | (-1.177, -0.384) | 0.00514  |

|                                                     |             |           |          |                           |          |
|-----------------------------------------------------|-------------|-----------|----------|---------------------------|----------|
| Lithocholic Acid (pg/ml)                            | (Intercept) | 1095.3046 | 364.1143 | (391.761, 1808.704)       | 0.004788 |
|                                                     | Baseline    | 0.3950    | 0.0858   | (0.226, 0.566)            | 0.000153 |
|                                                     | Treatment   | -87.8023  | 327.6418 | (-737.509, 567.368)       | 0.791714 |
|                                                     | Period      | 328.0238  | 327.7033 | (-294.049, 967.144)       | 0.329898 |
| Nutriocholic Acid-Isomer (pg/ml)                    | (Intercept) | 6.2364    | 2.7715   | (0.660, 11.548)           | 0.03065  |
|                                                     | Baseline    | 0.4584    | 0.1516   | (0.165, 0.768)            | 0.00593  |
|                                                     | Treatment   | -0.2717   | 2.5579   | (-5.342, 4.732)           | 0.91683  |
|                                                     | Period      | -1.1873   | 2.5649   | (-6.313, 3.881)           | 0.65010  |
| 7a_Hydroxy_3_oxo_5b_cholanoic Acid (pg/ml)          | (Intercept) | 7.6346    | 2.2449   | (3.099, 12.129)           | 0.00166  |
|                                                     | Baseline    | 0.2234    | 0.1500   | (-0.083, 0.526)           | 0.14685  |
|                                                     | Treatment   | -1.4368   | 2.0167   | (-5.419, 2.448)           | 0.48677  |
|                                                     | Period      | -0.6760   | 2.0229   | (-4.587, 3.333)           | 0.74268  |
| Deoxycholic Acid (pg/ml)                            | (Intercept) | 67.9236   | 31.9391  | (2.870, 130.364)          | 0.0404   |
|                                                     | Baseline    | 0.5740    | 0.1222   | (0.327, 0.820)            | 3.75e-05 |
|                                                     | Treatment   | -20.3103  | 28.3843  | (-76.585, 37.266)         | 0.4789   |
|                                                     | Period      | 33.4798   | 28.4394  | (-27.022, 88.685)         | 0.2468   |
| Ursodeoxycholic Acid (pg/ml)                        | (Intercept) | 2.1751    | 1.76867  | (-1.435e+00, 5.607)       | 0.227    |
|                                                     | Baseline    | 0.3288    | 0.0548   | (2.231e-01, 0.433)        | 6.93e-07 |
|                                                     | Treatment   | 1.0245    | 1.9640   | (-2.790e+00, 5.063)       | 0.605    |
|                                                     | Period      | 0.9950    | 1.9640   | (-2.814e+00, 4.832)       | 0.616    |
| Ursodeoxycholic Acid (log-scale) (pg/ml)            | (Intercept) | 0.55596   | 0.26699  | (0.012, 1.073)            | 0.044676 |
|                                                     | Baseline    | 0.51670   | 0.124480 | (0.267, 0.764)            | 0.000414 |
|                                                     | Treatment   | 0.04490   | 0.22404  | (-0.384, 0.474)           | 0.843912 |
|                                                     | Period      | -0.0434   | 0.22409  | (-0.460, 0.398)           | 0.849005 |
| 3a_6b_7b_Trihydroxycholeic Acid (pg/ml)             | (Intercept) | 15.3271   | 7.2105   | (1.038e+00, 29.237)       | 0.0405   |
|                                                     | Baseline    | 0.3730    | 0.0396   | (2.967e-01, 0.4533)       | 2.99e-11 |
|                                                     | Treatment   | -6.9471   | 8.1779   | (-2.337e+01, 8.904)       | 0.4012   |
|                                                     | Period      | -11.199   | 8.1779   | (-2.727e+01, 4.863)       | 0.1794   |
| 3a_6b_7b_Trihydroxycholeic Acid (log-scale) (pg/ml) | (Intercept) | 0.48929   | 0.34058  | (-1.630e-01, 1.138e+00)   | 0.159    |
|                                                     | Baseline    | 0.64235   | 0.10696  | (4.3756e-01, 8.5109e-01)  | 6.83e-07 |
|                                                     | Treatment   | 0.08911   | 0.30415  | (-5.1111e-01, 7.0968e-01) | 0.771    |

|                                                |             |          |         |                              |          |
|------------------------------------------------|-------------|----------|---------|------------------------------|----------|
|                                                | Period      | -0.0357  | 0.30420 | (-6.2745e-01,<br>5.6053e-01) | 0.907    |
| Glycodeoxycholic Acid (pg/ml)                  | (Intercept) | 0.86449  | 0.21678 | (0.44, 1.299)                | 0.000312 |
|                                                | Baseline    | 0.11331  | 0.06857 | (-0.029, 0.251)              | 0.107652 |
|                                                | Treatment   | 0.06012  | 0.18308 | (-0.288, 0.411)              | 0.746713 |
|                                                | Period      | 0.22683  | 0.18316 | (-0.584, 0.128)              | 0.232665 |
| Glycochenodeoxycholic Acid (pg/ml)             | (Intercept) | 1.2459   | 0.6643  | (-0.130, 2.501)              | 0.068954 |
|                                                | Baseline    | 0.3001   | 0.0724  | (0.151, 0.442)               | 0.000225 |
|                                                | Treatment   | 0.5371   | 0.6412  | (-0.694, 1.750)              | 0.414674 |
|                                                | Period      | 0.0902   | 0.6413  | (-1.145, 1.3643)             | 0.889866 |
| Glycochenodeoxycholic Acid (log-scale) (pg/ml) | (Intercept) | -0.0645  | 0.2762  | (-0.612, 0.459)              | 0.81653  |
|                                                | Baseline    | 0.63336  | 0.1502  | (0.340, 0.935)               | 0.00023  |
|                                                | Treatment   | 0.26215  | 0.2456  | (-0.214, 0.751)              | 0.30198  |
|                                                | Period      | -0.16417 | 0.2461  | (-0.672, 0.327)              | 0.51429  |
| Glycocholic Acid (pg/ml)                       | (Intercept) | 2.4310   | 1.1282  | (2.091e-01, 4.720)           | 0.0379   |
|                                                | Baseline    | 0.2944   | 0.1121  | (7.779e-02, 0.514)           | 0.0126   |
|                                                | Treatment   | 0.1918   | 1.1329  | (-2.061e+00, 2.463)          | 0.8665   |
|                                                | Period      | -0.7513  | 1.1331  | (-3.020e+00, 1.550)          | 0.5115   |
| Taurodeoxycholic Acid (pg/ml)                  | (Intercept) | 0.3403   | 0.0801  | (0.186, 0.498)               | 0.000195 |
|                                                | Baseline    | 0.2146   | 0.0495  | (0.117, 0.309)               | 0.000286 |
|                                                | Treatment   | -0.0515  | 0.0573  | (-0.166, 0.056)              | 0.380782 |
|                                                | Period      | -0.0702  | 0.0573  | (-0.185, 0.043)              | 0.236738 |
| Taurodeoxycholic Acid (log-scale) (pg/ml)      | (Intercept) | -0.3943  | 0.1732  | (-7.383e-01, -0.056)         | 0.0295   |
|                                                | Baseline    | 0.53746  | 0.0990  | (3.364e-01, 0.737)           | 1.25e-05 |
|                                                | Treatment   | -0.0564  | 0.1272  | (-3.124e-01, 0.190)          | 0.6630   |
|                                                | Period      | -0.2901  | 0.1279  | (-5.372e-01, -0.036)         | 0.0366   |
| Taurocholic Acid (pg/ml)                       | (Intercept) | 0.6543   | 0.2114  | (0.246, 1.056)               | 0.00394  |
|                                                | Baseline    | 0.2793   | 0.0464  | (0.186, 0.370)               | 1.03e-05 |
|                                                | Treatment   | -0.143   | 0.1827  | (-0.484, 0.207)              | 0.44536  |
|                                                | Period      | -0.213   | 0.1827  | (-0.573, 0.142)              | 0.25843  |
| Taurocholic Acid (log-scale) (pg/ml)           | (Intercept) | 0.0634   | 0.2803  | (-0.476, 0.610)              | 0.823    |
|                                                | Baseline    | 0.7023   | 0.1339  | (0.434, 0.970)               | 3.84e-05 |
|                                                | Treatment   | -0.2738  | 0.2752  | (-0.824, 0.267)              | 0.335    |
|                                                | Period      | -0.2602  | 0.2755  | (-0.804, 0.289)              | 0.360    |

**Table S6 – All Cytokines Outcome Data for 10 Randomly Selected Participants**

| Study Code (Participant) | Cohort | Treatment | Period | GMCSF pg/ml | IFn-Gamma pg/ml | IL-10 pg/ml | IL-12/p70 pg/ml | IL-13 pg/ml | IL-1b pg/ml | IL-2 pg/ml | IL-4 pg/ml | IL-5 pg/ml | IL-6 pg/ml | IL-7 pg/ml | IL-8 pg/ml | TNFa pg/ml |
|--------------------------|--------|-----------|--------|-------------|-----------------|-------------|-----------------|-------------|-------------|------------|------------|------------|------------|------------|------------|------------|
| HOP-01                   | A      | Control   | 1      | 171         | 17.96           | 24.23       | 6.59            | 9.34        | 2.61        | 3.55       | 65.81      | 3.76       | 6.12       | 20.86      | 3.25       | 11.48      |
|                          |        | Cricket   | 2      | 189         | 15.51           | 15.38       | 6.05            | 10.93       | 2.36        | 2.55       | 87.49      | 3.26       | 5.35       | 17.39      | 4.03       | 9.87       |
|                          |        | Baseline  | 0      | 145         | 14.51           | 12.26       | 4.75            | 7.8         | 2.55        | 2.25       | 66.03      | 2.54       | 4.68       | 12.26      | 2.64       | 8.05       |
| HOP-02                   | A      | Control   | 1      | 127         | 17.96           | 19.85       | 5.89            | 6.85        | 2.64        | 2.76       | 61.4       | 1.65       | 6.59       | 16.33      | 3.2        | 7.06       |
|                          |        | Cricket   | 2      | 125         | 16.75           | 20.08       | 6.25            | 8.45        | 2.81        | 3.04       | 80.4       | 2.33       | 7.78       | 18.17      | 3.25       | 6.96       |
|                          |        | Baseline  | 0      | 117         | 16.52           | 19.37       | 6.82            | 8.74        | 2.8         | 3.22       | 65.59      | 2.13       | 7.21       | 20.56      | 3.02       | 8.24       |
| HOP-05                   | A      | Control   | 1      | 217         | 11.04           | 24.64       | 5.41            | 15.04       | 2.93        | 2.31       | 103        | 0.72       | 0.34       | 20.21      | 8.54       | 9.28       |
|                          |        | Cricket   | 2      | 244         | 7.79            | 24.94       | 5.39            | 14.27       | 2.99        | 2.56       | 89.2       | 1.26       | 0.26       | 18.23      | 8.64       | 6.86       |
|                          |        | Baseline  | 0      | 225         | 10.55           | 18.02       | 5.7             | 11.63       | 3.27        | 2.9        | 128        | 1.13       | 0.34       | 16.83      | 7.42       | 9          |
| HOP-08                   | A      | Control   | 1      | 45.56       | 17.99           | 18.43       | 4.64            | 12.52       | 2.67        | 2.8        | 104        | 3.57       | 4.72       | 15.14      | 3.47       | 8.34       |
|                          |        | Cricket   | 2      | 37.67       | 16.49           | 15.62       | 4.58            | 11.4        | 2.28        | 2.43       | 94.52      | 2.36       | 3.9        | 13.07      | 2.85       | 7.27       |
|                          |        | Baseline  | 0      | 45.12       | 15.33           | 17.49       | 4.9             | 14.11       | 2.92        | 2.35       | 111        | 3.26       | 3.91       | 16.27      | 3.53       | 7.87       |
| HOP-09                   | B      | Control   | 2      | 53.22       | 5.87            | 7.17        | 3.49            | 3.33        | 1.84        | 1.49       | 79.32      | 1.41       | 2.17       | 16.71      | 2.97       | 6.72       |
|                          |        | Cricket   | 1      | 65.92       | 9.73            | 8.65        | 5.06            | 3.45        | 2.29        | 1.71       | 94.3       | 1.43       | 3.68       | 14.97      | 4.12       | 7.08       |
|                          |        | Baseline  | 0      | 53.14       | 9.56            | 9.65        | 4.17            | 3.86        | 1.47        | 1.72       | 81.48      | 1.67       | 2.96       | 15.69      | 3.84       | 6.68       |
| HOP-11                   | B      | Control   | 2      | 214         | 15.68           | 38.57       | 7.49            | 21.5        | 5.01        | 5.45       | 120        | 5.94       | 7.01       | 26.9       | 5.63       | 9.6        |
|                          |        | Cricket   | 1      | 272         | 30.96           | 73.84       | 10.44           | 26.88       | 5.18        | 5.79       | 152        | 7.15       | 10.27      | 30.99      | 5.81       | 10.24      |
|                          |        | Baseline  | 0      | 280         | 31.26           | 77.59       | 10.5            | 27.32       | 4.82        | 6.08       | 138        | 7.3        | 10.73      | 32.83      | 6.04       | 9.49       |
| HOP-15                   | B      | Control   | 2      | 172         | 17.19           | 35.44       | 5.98            | 161         | 3.09        | 3.84       | 131        | 31.15      | 7.14       | 24.79      | 14.58      | 7.3        |
|                          |        | Cricket   | 1      | 193         | 20.11           | 40.7        | 6.23            | 143         | 3.69        | 4.14       | 120        | 32.41      | 7.59       | 22.31      | 13.03      | 7.6        |
|                          |        | Baseline  | 0      | 184         | 16.15           | 36.15       | 5.26            | 177         | 3.22        | 3.59       | 124        | 34.56      | 5.77       | 22.14      | 15.49      | 6.94       |
|                          | B      | Control   | 2      | 61.01       | 3.31            | 8.87        | 3.14            | 3.76        | 1.47        | 1.32       | 42.05      | 0.28       | 1.8        | 9.72       | 3.53       | 5.9        |

|        |          |   |        |       |       |      |       |      |      |        |       |      |       |       |      |
|--------|----------|---|--------|-------|-------|------|-------|------|------|--------|-------|------|-------|-------|------|
| HOP-16 | Cricket  | 1 | 57.95  | 3.52  | 8.15  | 2.85 | 5.19  | 1.5  | 1.29 | 39.6   | 0.46  | 1.87 | 7.87  | 3.5   | 6.13 |
|        | Baseline | 0 | 69.93  | 6.25  | 12.49 | 3.14 | 5.81  | 1.83 | 1.72 | 42.05  | 0.92  | 2.08 | 8.2   | 4.48  | 6.6  |
| HOP-18 | Control  | 2 | 199    | 9.36  | 14.8  | 3.45 | 8.5   | 1.59 | 3.25 | 89.84  | 1.74  | 3.38 | 16.63 | 2.56  | 7.14 |
|        | Cricket  | 1 | 198    | 7.47  | 11.34 | 3.4  | 9.72  | 1.81 | 3.17 | 106    | 0.8   | 2.71 | 13.99 | 3     | 7.02 |
|        | Baseline | 0 | 176    | 10.55 | 13.76 | 3.71 | 8.35  | 2.01 | 2.7  | 112    | 1.26  | 3.41 | 15.56 | 2.55  | 6.68 |
| HOP-19 | Control  | 2 | 167.00 | 15.21 | 38.87 | 6.01 | 63.81 | 2.79 | 2.76 | 144.00 | 12.95 | 6.83 | 28.80 | 10.33 | 8.63 |
|        | Cricket  | 1 | 165    | 15.4  | 37.51 | 6.5  | 59.55 | 2.35 | 2.75 | 143    | 12.5  | 7.12 | 29.49 | 9.92  | 8.72 |
|        | Baseline | 0 | 174    | 18.03 | 46.24 | 9.23 | 50.07 | 3.57 | 4.22 | 197    | 13.82 | 7.26 | 16.71 | 7.91  | 10.1 |

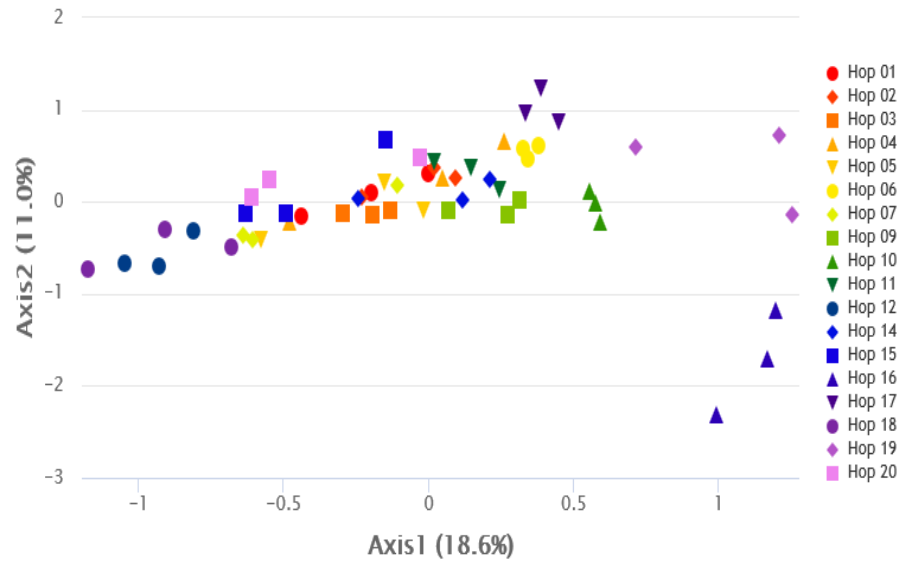

**Figure S2 - Compositional Dissimilarity by Participant Across Treatment Periods**

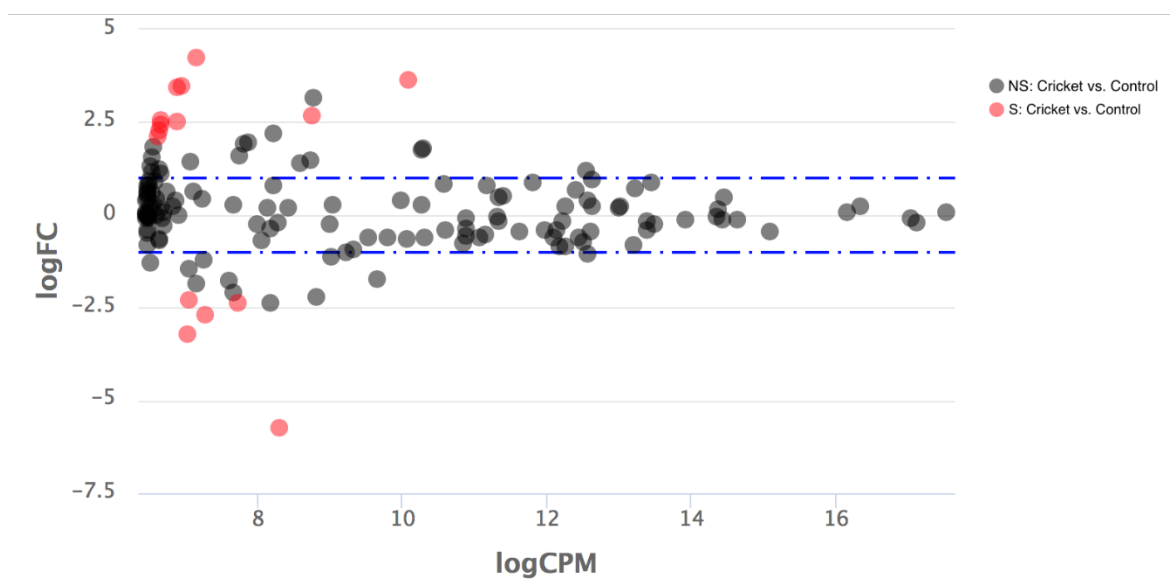

**Figure S3 - Log-fold change in bacterial species abundance with cricket consumption compared to control diet (Genewise negative binomial GLM;  $q < 0.1$ ) [NS=not significant, S=significant]**

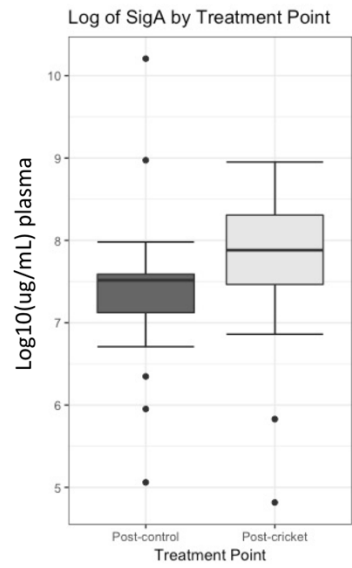

**Figure S4 - Boxplots of Average sIgA Across Treatment Periods ( $\mu\text{g/ml}$ )**
